# Supplementary material for: Investigation of Cannabis sativa Phytochemicals as Anti-Alzheimer’s Agents: An In Silico Study
Source: MDPI journal article supplement (doi:10.3390/plants12030510), 2023-01-22
Supplement: s1 [file s1]

## Supplementary Materials

Table S1: Overall compounds used in this study

| Compounds                                            | Mw      | HA | HD | Absorption | Lipinski's<br>rule<br>(Violation) | Solubility | BBB<br>Permeability | CNS<br>Permeability | CYP2D6 | HHP |
|------------------------------------------------------|---------|----|----|------------|-----------------------------------|------------|---------------------|---------------------|--------|-----|
| (-)-CBD                                              | 314.469 | 2  | 2  | 89.308     | 1                                 | -5.609     | -0.074              | -1.741              | NO     | NO  |
| (+)-CBD                                              | 314.469 | 4  | 2  | 91.162     | 1                                 | -5.042     | 0.489               | -1.807              | NO     | NO  |
| (+)-DMH-CBD                                          | 370.577 | 2  | 2  | 89.034     | 1                                 | -6.551     | -0.208              | -1.587              | NO     | NO  |
| 0-1602                                               | 258.361 | 2  | 2  | 92.957     | 0                                 | -3.821     | 0.227               | -1.882              | NO     | NO  |
| 11-HydroxyTHC                                        | 330.468 | 3  | 2  | 91.772     | 0                                 | -4.367     | -0.216              | -1.959              | NO     | NO  |
| 11-Nor-9-carboxy-<br>delta-9<br>tetrahydrocannabinol | 344.44  | 3  | 2  | 94.696     | 0                                 | -3.859     | -0.367              | -2.012              | NO     | NO  |
| 11-oxo-(delta)9 THC                                  | 328.452 | 3  | 1  | 93.759     | 0                                 | -4.967     | -0.224              | -2.017              | NO     | NO  |
| 2-Aracilonylglycerol                                 | 378.553 | 4  | 2  | 91.67      | 0                                 | -5.095     | -0.238              | -2.955              | NO     | NO  |
| 3-carene                                             | 222.372 | 1  | 1  | 91.645     | 0                                 | -4.45      | 0.592               | -2.279              | NO     | NO  |
| Abn-CBD                                              | 314.469 | 2  | 2  | 90.33      | 1                                 | -6.075     | -0.148              | -2.107              | NO     | NO  |
| Anandamide                                           | 347.543 | 2  | 2  | 90.907     | 0                                 | -5.475     | -0.516              | -2.754              | NO     | NO  |
| Apigenin                                             | 270.24  | 5  | 3  | 91.856     | 0                                 | -3.178     | -0.951              | -2.211              | NO     | NO  |
| Bornyl acetate                                       | 196.29  | 2  | 0  | 95.196     | 0                                 | -3.009     | 0.536               | -2.376              | NO     | NO  |
| Cannabichromanon                                     | 332.44  | 4  | 1  | 93.497     | 0                                 | -5.055     | -0.409              | -2.235              | NO     | NO  |
| Cannabichromene                                      | 314.469 | 2  | 1  | 90.648     | 1                                 | -5.532     | 0.657               | -1.976              | NO     | NO  |
| Cannabichromenic<br>acid                             | 358.478 | 3  | 2  | 93.893     | 0                                 | -3.143     | 0.107               | -2.082              | NO     | NO  |
| Cannabichromevarinic<br>acid                         | 330.424 | 3  | 2  | 94.676     | 0                                 | -2.972     | 0.191               | -2.003              | NO     | NO  |
| Cannabicitran                                        | 314.469 | 2  | 0  | 93.93      | 1                                 | -5.92      | 0.379               | -2.225              | NO     | NO  |
| Cannabicyclol                                        | 314.469 | 2  | 1  | 91.861     | 1                                 | -5.007     | 0.551               | -1.828              | NO     | NO  |
| Cannabicyclovarin                                    | 286.415 | 2  | 1  | 91.271     | 0                                 | -4.953     | 0.36                | -2.011              | NO     | NO  |
| Cannabidibutol                                       | 300.442 | 2  | 2  | 89.528     | 0                                 | -5.301     | -0.025              | -1.829              | NO     | NO  |
| Cannabidiorcol                                       | 254.329 | 2  | 1  | 92.851     | 0                                 | -4.599     | 0.397               | -1.368              | NO     | NO  |
| Cannabidiphorol                                      | 342.523 | 2  | 2  | 89.555     | 1                                 | -6.327     | -0.196              | -1.523              | NO     | NO  |
| Cannabidivarinic acid                                | 330.424 | 3  | 3  | 97.849     | 0                                 | -3.723     | -0.836              | -2.016              | NO     | NO  |
| Cannabielsoic Acid A                                 | 374.477 | 4  | 3  | 95.774     | 0                                 | -3.008     | -1.01               | -2.139              | NO     | NO  |
| Cannabielsoic Acid B                                 | 374.477 | 4  | 3  | 97.784     | 0                                 | -3.507     | -0.899              | -2.235              | NO     | NO  |
| Cannabielsoin                                        | 330.46  | 5  | 3  | 92.665     | 0                                 | -4.494     | -0.2                | -1.893              | NO     | NO  |
| Cannabifuran                                         | 310.43  | 2  | 1  | 91.801     | 1                                 | -5.787     | -0.14               | -1.22               | NO     | YES |
| Cannabigerolic acid                                  | 360.494 | 3  | 3  | 95.782     | 1                                 | -3.515     | -0.911              | -2.269              | NO     | NO  |
| Cannabigerovarin                                     | 288.431 | 2  | 2  | 90.132     | 1                                 | -5.533     | -0.182              | -1.507              | NO     | NO  |

|                                            |         |   |   |        |   |        |        |        |     |     |
|--------------------------------------------|---------|---|---|--------|---|--------|--------|--------|-----|-----|
| <b>Cannabigerovarinic acid</b>             | 332.44  | 3 | 3 | 96.772 | 0 | -3.599 | -0.848 | -2.276 | NO  | NO  |
| <b>Cannabimovone</b>                       | 332.44  | 4 | 3 | 91.532 | 0 | -3.773 | -0.692 | -2.317 | NO  | NO  |
| <b>Cannabinol</b>                          | 310.437 | 2 | 1 | 92.888 | 1 | -5.845 | 0.727  | -1.384 | NO  | NO  |
| <b>Cannabinol C2</b>                       | 268.356 | 2 | 1 | 93.96  | 0 | -4.834 | 0.5    | -1.32  | NO  | YES |
| <b>Cannabinol C4</b>                       | 296.41  | 2 | 1 | 93.14  | 0 | -5.58  | 0.671  | -1.389 | NO  | NO  |
| <b>Cannabinol methyl ether</b>             | 324.46  | 2 | 0 | 95.747 | 1 | -6.552 | 0.563  | -1.411 | NO  | NO  |
| <b>Cannabinolic acid</b>                   | 354.446 | 3 | 2 | 95.906 | 0 | -3.473 | 0.176  | -1.853 | NO  | NO  |
| <b>Cannabiripsol</b>                       | 348.483 | 4 | 3 | 93.486 | 0 | -3.586 | -0.887 | -2.105 | NO  | NO  |
| <b>Cannabisativine</b>                     | 381.561 | 5 | 4 | 92.94  | 0 | -2.4   | -0.708 | -3.47  | NO  | NO  |
| <b>Cannabisin A</b>                        | 594.62  | 8 | 8 | 76.265 | 2 | -2.892 | -1.631 | -3.339 | YES | YES |
| <b>Cannabisin B</b>                        | 596.636 | 8 | 8 | 71.398 | 2 | -2.892 | -1.408 | -3.472 | NO  | YES |
| <b>Cannabisin C</b>                        | 610.663 | 8 | 7 | 76.003 | 2 | -2.893 | -1.281 | -3.377 | NO  | YES |
| <b>Cannabisin D</b>                        | 624.69  | 8 | 6 | 80.562 | 2 | -2.906 | -1.161 | -3.263 | NO  | YES |
| <b>Cannabitriol</b>                        | 346.46  | 4 | 3 | 93.328 | 0 | -3.592 | -0.893 | -2.094 | NO  | NO  |
| <b>Cannabitwinol</b>                       | 620.789 | 4 | 0 | 100    | 2 | -3.181 | -1.125 | -0.887 | NO  | NO  |
| <b>Cannaflavin A</b>                       | 436.504 | 6 | 3 | 90.178 | 0 | -4.588 | -1.221 | -2.084 | NO  | NO  |
| <b>Canniprene</b>                          | 342.435 | 4 | 2 | 92.831 | 0 | -5.563 | -0.296 | -2.191 | NO  | NO  |
| <b>CBD</b>                                 | 314.469 | 2 | 2 | 89.308 | 1 | -5.609 | -0.074 | -1.741 | NO  | NO  |
| <b>CBDa</b>                                | 358.478 | 3 | 3 | 96.669 | 0 | -3.801 | -0.907 | -1.993 | NO  | NO  |
| <b>CBD-aldehyde-diacetate</b>              | 412.526 | 5 | 0 | 95.976 | 0 | -6.556 | -0.488 | -2.175 | NO  | NO  |
| <b>CBD-Q(VIII)</b>                         | 433.592 | 4 | 2 | 89.931 | 0 | -5.938 | -0.203 | -1.947 | NO  | NO  |
| <b>CBDV</b>                                | 286.415 | 2 | 2 | 89.745 | 0 | -5.099 | -0.003 | -1.901 | NO  | NO  |
| <b>CBE</b>                                 | 235.308 | 3 | 1 | 92.597 | 0 | -2.897 | 0.236  | -1.97  | NO  | YES |
| <b>CBG</b>                                 | 316.485 | 2 | 2 | 87.518 | 1 | -4.687 | -0.302 | -0.86  | NO  | NO  |
| <b>Chrysoeriol</b>                         | 300.266 | 6 | 3 | 85.342 | 0 | -3.38  | -1.046 | -2.419 | NO  | NO  |
| <b>Dehydrocannabifuran</b>                 | 308.421 | 2 | 1 | 90.563 | 1 | -5.693 | 0.035  | -1.158 | NO  | YES |
| <b>Delta 8 THC</b>                         | 314.469 | 2 | 1 | 92.205 | 1 | -5.374 | 0.493  | -1.865 | NO  | NO  |
| <b>Delta-9-Cannabivarinic Acid</b>         | 330.424 | 3 | 2 | 94.903 | 0 | -2.956 | 0.295  | -1.778 | NO  | NO  |
| <b>Delta-9-cis-tetrahydrocannabinol</b>    | 314.469 | 2 | 1 | 91.162 | 1 | -5.042 | 0.489  | -1.807 | NO  | NO  |
| <b>Delta-9-tetrahydrocannabinolic acid</b> | 358.478 | 3 | 2 | 94.353 | 0 | -3.137 | 0.199  | -1.748 | NO  | NO  |
| <b>Delta-9-tetrahydrocannabinorcol</b>     | 258.361 | 2 | 1 | 91.943 | 0 | -3.683 | 0.21   | -2.163 | NO  | NO  |
| <b>Delta-guaiene</b>                       | 204.357 | 0 | 0 | 93.329 | 1 | -5.99  | 0.773  | -1.838 | NO  | NO  |
| <b>Eucalyptol</b>                          | 154.253 | 1 | 0 | 96.505 | 0 | -2.63  | 0.368  | -2.972 | NO  | NO  |

|                    |         |   |   |        |   |        |        |        |    |     |
|--------------------|---------|---|---|--------|---|--------|--------|--------|----|-----|
| <b>H2 DMH-CBD</b>  | 372.593 | 2 | 2 | 89.242 | 1 | -6.29  | -0.401 | -1.202 | NO | NO  |
| <b>HU-308</b>      | 414.63  | 3 | 1 | 93.478 | 1 | -6.512 | -0.209 | -2.255 | NO | NO  |
| <b>HU-331</b>      | 328.452 | 3 | 1 | 94.314 | 0 | -4.62  | -0.004 | -1.94  | NO | NO  |
| <b>HUF-101</b>     | 332.459 | 2 | 2 | 88.362 | 1 | -5.21  | 0.029  | -1.912 | NO | NO  |
| <b>KLS-13019</b>   | 355.47  | 3 | 2 | 91.629 | 0 | -4.284 | -0.186 | -1.976 | NO | YES |
| <b>THC</b>         | 314.469 | 2 | 1 | 91.162 | 1 | -5.042 | 0.489  | -1.807 | NO | NO  |
| <b>THCA-B</b>      | 358.478 | 3 | 2 | 94.833 | 0 | -3.645 | -0.357 | -1.839 | NO | NO  |
| <b>THC-acetate</b> | 356.506 | 3 | 0 | 93.655 | 1 | -6.244 | 0.197  | -2.23  | NO | NO  |
| <b>THC-COOH</b>    | 344.451 | 3 | 2 | 94.696 | 0 | -3.859 | -0.367 | -2.012 | NO | NO  |
| <b>THCV</b>        | 286.415 | 2 | 1 | 91.821 | 0 | -4.403 | 0.336  | -1.99  | NO | NO  |
| <b>VCE-003.2</b>   | 373.537 | 4 | 2 | 90.024 | 0 | -5.117 | -0.337 | -2.33  | NO | NO  |
| <b>VCE-004.8</b>   | 433.592 | 4 | 2 | 89.931 | 0 | -5.938 | -0.203 | -1.947 | NO | NO  |

Table S2: Compounds passing HHP and Lipinski’s rule

| Compound                                             | m.w     | HA | HD | Absorption | Lipinski’s<br>rule<br>(Violation) | Solubility | BBB<br>Permeability | CNS<br>Permeability | CYP2D6 |
|------------------------------------------------------|---------|----|----|------------|-----------------------------------|------------|---------------------|---------------------|--------|
| 0-1602                                               | 258.361 | 2  | 2  | 92.957     | 0                                 | -3.821     | 0.227               | -1.882              | NO     |
| 11-HydroxyTHC                                        | 330.468 | 3  | 2  | 91.772     | 0                                 | -4.367     | -0.216              | -1.959              | NO     |
| 11-Nor-9-carboxy-<br>delta-9<br>tetrahydrocannabinol | 344.44  | 3  | 2  | 94.696     | 0                                 | -3.859     | -0.367              | -2.012              | NO     |
| 11-oxo-(delta)9 THC                                  | 328.452 | 3  | 1  | 93.759     | 0                                 | -4.967     | -0.224              | -2.017              | NO     |
| 3-carene                                             | 222.372 | 1  | 1  | 91.645     | 0                                 | -4.45      | 0.592               | -2.279              | NO     |
| Apigenin                                             | 270.24  | 5  | 3  | 91.856     | 0                                 | -3.178     | -0.951              | -2.211              | NO     |
| Bornyl acetate                                       | 196.29  | 2  | 0  | 95.196     | 0                                 | -3.009     | 0.536               | -2.376              | NO     |
| Cannabichromanon                                     | 332.44  | 4  | 1  | 93.497     | 0                                 | -5.055     | -0.409              | -2.235              | NO     |
| Cannabichromenic acid                                | 358.478 | 3  | 2  | 93.893     | 0                                 | -3.143     | 0.107               | -2.082              | NO     |
| Cannabichromevarinic<br>acid                         | 330.424 | 3  | 2  | 94.676     | 0                                 | -2.972     | 0.191               | -2.003              | NO     |
| Cannabicyclovarin                                    | 286.415 | 2  | 1  | 91.271     | 0                                 | -4.953     | 0.36                | -2.011              | NO     |
| Cannabidibutol                                       | 300.442 | 2  | 2  | 89.528     | 0                                 | -5.301     | -0.025              | -1.829              | NO     |
| Cannabidiorcol                                       | 254.329 | 2  | 1  | 92.851     | 0                                 | -4.599     | 0.397               | -1.368              | NO     |
| Cannabidivarinic acid                                | 330.424 | 3  | 3  | 97.849     | 0                                 | -3.723     | -0.836              | -2.016              | NO     |
| Cannabielsoic Acid A                                 | 374.477 | 4  | 3  | 95.774     | 0                                 | -3.008     | -1.01               | -2.139              | NO     |
| Cannabielsoic Acid B                                 | 374.477 | 4  | 3  | 97.784     | 0                                 | -3.507     | -0.899              | -2.235              | NO     |
| Cannabielsoin                                        | 330.46  | 5  | 3  | 92.665     | 0                                 | -4.494     | -0.2                | -1.893              | NO     |
| Cannabigerovarinic<br>acid                           | 332.44  | 3  | 3  | 96.772     | 0                                 | -3.599     | -0.848              | -2.276              | NO     |

|                                     |         |   |   |        |   |        |        |        |    |
|-------------------------------------|---------|---|---|--------|---|--------|--------|--------|----|
| Cannabimovone                       | 332.44  | 4 | 3 | 91.532 | 0 | -3.773 | -0.692 | -2.317 | NO |
| Cannabinol C2                       | 268.356 | 2 | 1 | 93.96  | 0 | -4.834 | 0.5    | -1.32  | NO |
| Cannabinol C4                       | 296.41  | 2 | 1 | 93.14  | 0 | -5.58  | 0.671  | -1.389 | NO |
| Cannabinolic acid                   | 354.446 | 3 | 2 | 95.906 | 0 | -3.473 | 0.176  | -1.853 | NO |
| Cannabiripsol                       | 348.483 | 4 | 3 | 93.486 | 0 | -3.586 | -0.887 | -2.105 | NO |
| Cannabisativine                     | 381.561 | 5 | 4 | 92.94  | 0 | -2.4   | -0.708 | -3.47  | NO |
| Cannabitriol                        | 346.46  | 4 | 3 | 93.328 | 0 | -3.592 | -0.893 | -2.094 | NO |
| Cannaflavin A                       | 436.504 | 6 | 3 | 90.178 | 0 | -4.588 | -1.221 | -2.084 | NO |
| Canniprene                          | 342.435 | 4 | 2 | 92.831 | 0 | -5.563 | -0.296 | -2.191 | NO |
| CBDA                                | 358.478 | 3 | 3 | 96.669 | 0 | -3.801 | -0.907 | -1.993 | NO |
| CBD-aldehyde-diacetate              | 412.526 | 5 | 0 | 95.976 | 0 | -6.556 | -0.488 | -2.175 | NO |
| CBD-Q(VIII)                         | 433.592 | 4 | 2 | 89.931 | 0 | -5.938 | -0.203 | -1.947 | NO |
| CBDV                                | 286.415 | 2 | 2 | 89.745 | 0 | -5.099 | -0.003 | -1.901 | NO |
| CBE                                 | 235.308 | 3 | 1 | 92.597 | 0 | -2.897 | 0.236  | -1.97  | NO |
| Chrysoeriol                         | 300.266 | 6 | 3 | 85.342 | 0 | -3.38  | -1.046 | -2.419 | NO |
| Delta-9-Cannabivarinic Acid         | 330.424 | 3 | 2 | 94.903 | 0 | -2.956 | 0.295  | -1.778 | NO |
| Delta-9-tetrahydrocannabinolic acid | 358.478 | 3 | 2 | 94.353 | 0 | -3.137 | 0.199  | -1.748 | NO |
| Delta-9-tetrahydrocannabinorcol     | 258.361 | 2 | 1 | 91.943 | 0 | -3.683 | 0.21   | -2.163 | NO |
| Eucalyptol                          | 154.253 | 1 | 0 | 96.505 | 0 | -2.63  | 0.368  | -2.972 | NO |
| HU-331                              | 328.452 | 3 | 1 | 94.314 | 0 | -4.62  | -0.004 | -1.94  | NO |
| KLS-13019                           | 355.47  | 3 | 2 | 91.629 | 0 | -4.284 | -0.186 | -1.976 | NO |
| THCA-B                              | 358.478 | 3 | 2 | 94.833 | 0 | -3.645 | -0.357 | -1.839 | NO |
| THC-COOH                            | 344.451 | 3 | 2 | 94.696 | 0 | -3.859 | -0.367 | -2.012 | NO |
| THCV                                | 286.415 | 2 | 1 | 91.821 | 0 | -4.403 | 0.336  | -1.99  | NO |
| VCE-003.2                           | 373.537 | 4 | 2 | 90.024 | 0 | -5.117 | -0.337 | -2.33  | NO |
| VCE-004.8                           | 433.592 | 4 | 2 | 89.931 | 0 | -5.938 | -0.203 | -1.947 | NO |

Table S3: Compounds passing BBB permeability

| Compounds | Absorption | Lipinski's rule<br>(Violation) | Solubility | BBB<br>Permeability | CNS<br>Permeability | CYP2D6 | LD50 | Toxicity<br>class |
|-----------|------------|--------------------------------|------------|---------------------|---------------------|--------|------|-------------------|
| 3-carene  | 91.645     | 0                              | -4.45      | 0.592               | -2.279              | NO     | 2000 | 4                 |

|                   |        |   |        |       |        |    |      |   |
|-------------------|--------|---|--------|-------|--------|----|------|---|
| Bornyl acetate    | 95.196 | 0 | -3.009 | 0.536 | -2.376 | NO | 3100 | 5 |
| Cannabicyclovarin | 91.271 | 0 | -4.953 | 0.36  | -2.011 | NO | 860  | 4 |
| Cannabidiorcol    | 92.851 | 0 | -4.599 | 0.397 | -1.368 | NO | 800  | 4 |
| Cannabinol C2     | 93.96  | 0 | -4.834 | 0.5   | -1.32  | NO | 1310 | 4 |
| Eucalyptol        | 96.505 | 0 | -2.63  | 0.368 | -2.972 | NO | 2480 | 5 |
| THCV              | 91.821 | 0 | -4.403 | 0.336 | -1.99  | NO | 482  | 4 |
